# Supplementary material for: Dapagliflozin Versus Glipizide as Add-on Therapy in Patients With Type 2 Diabetes Who Have Inadequate Glycemic Control With Metformin: A randomized, 52-week, double-blind, active-controlled noninferiority trial
Source: PubMed Central journal article supplement — Diabetes Care. 2011 Aug 19;34(9):2015–22. doi: 10.2337/dc11-0606 (PMC3161265; doi:10.2337/dc11-0606), 2011-08-19
Supplement: supp_dc11-0606v110606_DC110606SupplementaryData.pdf [file supp_dc11-0606v110606_DC110606SupplementaryData.pdf]

## SUPPLEMENTARY DATA

### Study investigators

*Argentina:* Jorge Alvarinas, Paula Antunez, Pablo Arias, Julio Bragagnolo, Ciro Busso, Maria Cantero, Patricia Castano, Alejandro Chertkoff, Jesus Cuadrado, Monica Diaz, Eduardo Farias, Claudia Issa, Natacha Maldonado, Laura Maffei, Fabio Massari, Isaac Sinay, Maria Ulla. *France:* Loïc Boucher, Alain Boye, Alain Campagne, Michel Krempf, Christophe Lemoine, Eric De Sainte Lorette, Claude Magnani. *Germany:* Stefan Bornstein, Karl-Michael Derwahl, Thomas Forst, Christine Kosch, Benno Mertens, Andrea Mölle, Michael Nauck, Andreas Pfeiffer, Andreas Preusche, Bernd-M Scholz, Gerald Tangerding, Birgit Tillenburg, Peter Uebel, Ulrich Wendisch, Bernhard Winkelmann, Ulrich Zimmermann, Dirk Züchner. *Great Britain:* Geoffrey Butcher, Ian Caldwell, Sharon Gillings, Peter Harvey, Alan Jaap, Manjit Jaspal, John Mcbride, Rory Reed, Stephen Rowlands, Barry D Silvert, Christopher Strang, Richard West. *Italy:* Pierpaolo De Feo, Sebastiano Filetti, Stefano Del Prato. *Mexico:* José Luis Cervantes, Aniceto Leguizamo Dimas, Geraldo Gonzalez, Alberto Miranda Linero, Jesus Miguel Escalante Pulido. *Netherlands:* Wim Alsem, Ivo Bierens, Anton Boermans, Joop Brussen, Henk Dirkse, Gerardus J.M. van Doesburg, Nasser Harbiye, Wouter W. van Kempen, Harry Mevissen, Douwe De Ruitter. *South Africa:* Asad E Bhorat, Lesley Burgess, Stephanus Komati, Ray Moore, Muhammed Moosa, Hendrik Nortje, Trevenesan Padayachee, Leslie Robertson, Mary Seeber, Dirkie Van Rensburg. *Spain:* Carlos Brotons Cuixart, Santiago Durán García, Luis De Teresa Parreño, José Sabán Ruiz, Carlos Trescoli Serrano, Albert Boada Valmaseda. *Sweden:* Carl-Peter Anderberg, Katarina Berndtsson Blom, Ulla-Britt Ericsson, Per Hellke, Lars-Gunnar Hjerne, Faris Al-Khalili, Per-Åke Lagerbäck, Carl-Johan Lindholm, Stina Lindmark, Kaj Stenlöf.

### Exclusion criteria

Diabetes-related exclusion criteria included: type 1 diabetes; diabetes insipidus; corticosteroid-induced type 2 diabetes; a history of diabetic ketoacidosis or hyperosmolar non-ketotic coma; poorly controlled diabetes characterized by polyuria/polydipsia with >10% weight loss; use of insulin within 1 year of enrolment, except in the case of hospitalization or use in gestational diabetes.

General exclusion criteria included: body mass index (BMI) >45.0 kg/m<sup>2</sup>; calculated creatinine clearance <60 mL/min; urine albumin:creatinine ratio >203.4 mg/mmol; aspartate aminotransferase and/or alanine aminotransferase and/or creatine kinase  $\geq 3 \times$  upper limit of normal range; serum total bilirubin >34  $\mu$ mol/L; hemoglobin (Hb)  $\leq 11$  g/dL for men and  $\leq 10$  g/dL for women; abnormal thyroid stimulating hormone level; systolic blood pressure  $\geq 180$  mmHg and/or diastolic blood pressure  $\geq 110$  mmHg; cardiovascular event within 6 months of enrolment; congestive heart failure; congenital renal glycosuria; significant renal, hepatic, respiratory, haematological, oncological, endocrine, immunological (including hypersensitivity to study medications), and alcohol and/or substance misuse disorders; pregnancy and/or lactation; use of systemic corticosteroids equivalent to >10 mg of oral prednisolone within 30 days of enrolment; a history of bariatric surgery; and use of weight loss medication within 30 days of enrolment.

SUPPLEMENTARY DATA

**Supplementary Table 1. Metformin dose adjustments during the 8-week stabilization period.**

| Metformin status during the 8 weeks prior to enrolment | Open-label metformin adaptation during 8-week dose stabilization | Open-label metformin during placebo lead-in |
|--------------------------------------------------------|------------------------------------------------------------------|---------------------------------------------|
| <b>Metformin monotherapy</b>                           |                                                                  |                                             |
| If metformin dose was:                                 |                                                                  |                                             |
| <1500 mg/day                                           | 1500 mg/day                                                      | 1500 mg/day                                 |
| ≥1500 mg/day, stable dose, and:                        | Skipped dose stabilization:                                      |                                             |
| ≥1500 and <1750 mg/day                                 | →                                                                | 1500 mg/day                                 |
| ≥1750 and <2250 mg/day                                 | →                                                                | 2000 mg/day                                 |
| ≥2250 mg/day                                           | →                                                                | 2500 mg/day                                 |
| ≥1500 mg/day, unstable dose, and:                      |                                                                  |                                             |
| ≥1500 and <1750 mg/day                                 | 1500 mg/day                                                      | 1500 mg/day                                 |
| ≥1750 and <2250 mg/day                                 | 2000 mg/day                                                      | 2000 mg/day                                 |
| ≥2250 mg/day                                           | 2500 mg/day                                                      | 2500 mg/day                                 |
| <b>Metformin plus ≤1 other OAD</b>                     |                                                                  |                                             |
| Discontinue other OAD                                  |                                                                  |                                             |
| If metformin dose was:                                 |                                                                  |                                             |
| <1500 mg/day                                           | 1500 mg/day                                                      | 1500 mg/day                                 |
| ≥1500 and <2000 mg/day                                 | 2000 mg/day                                                      | 2000 mg/day                                 |
| ≥2000 mg/day                                           | 2500 mg/day                                                      | 2500 mg/day                                 |

OAD, oral antidiabetic drug

**Sample size calculations**

To demonstrate non-inferiority of dapagliflozin in comparison with glipizide as add-on therapy to metformin for changes from baseline to week 52 in HbA1C with a non-inferiority margin of 0.35 %, assuming a standard deviation (SD) of 1.25 %, and at a one-sided significance level of 0.025, 280 evaluable patients were needed in each treatment group to provide approximately 90% power (given a true difference of zero between the 2 treatment groups). Assuming a 5% exclusion rate from the full analysis set, 295 patients per treatment group are needed for the full analysis set. Additionally, to have 90% power for the per-protocol population and assuming a 25% exclusion rate from the per-protocol population, 373 patients per treatment group (746 patients in total) were planned for randomization.

SUPPLEMENTARY DATA

**Supplementary Table 2. Demographic and baseline characteristics of the full analysis set.**

|                                                      | <b>Dapagliflozin + metformin</b> | <b>Glipizide + metformin</b> |
|------------------------------------------------------|----------------------------------|------------------------------|
| <b>Number of patients</b>                            | 400                              | 401                          |
| <b>Age, years, mean ± SD</b>                         | 58 ± 9                           | 59 ± 10                      |
| <b>Gender, n (%)</b>                                 |                                  |                              |
| Male                                                 | 221 (55.3)                       | 220 (54.9)                   |
| Female                                               | 179 (44.8)                       | 181 (45.1)                   |
| <b>Race, n (%)</b>                                   |                                  |                              |
| White                                                | 327 (81.8)                       | 323 (80.5)                   |
| Black                                                | 26 (6.5)                         | 24 (6.0)                     |
| Asian                                                | 27 (6.8)                         | 34 (8.5)                     |
| Other                                                | 20 (5.0)                         | 20 (5.0)                     |
| <b>Body mass index</b>                               |                                  |                              |
| Kg/m <sup>2</sup> , mean ± SD                        | 31.7 ± 5.1                       | 31.2 ± 5.1                   |
| ≥ 25 kg/m <sup>2</sup> , n (%)                       | 380 (95.0)                       | 364 (90.8)                   |
| ≥ 30 kg/m <sup>2</sup> , n (%)                       | 228 (57.0)                       | 222 (55.4)                   |
| <b>Duration of type 2 diabetes, years, mean ± SD</b> | 6 ± 5                            | 7 ± 6                        |
| <b>HbA1C, percent, mean ± SD</b>                     | 7.7 ± 0.9                        | 7.7 ± 0.9                    |
| <b>FPG, mmol/L, mean ± SD</b>                        | 9.0 ± 2.1                        | 9.1 ± 2.3                    |
| <b>Fasting C-peptide, nmol/L, mean ± SD</b>          | 1.00 ± 0.43                      | 0.95 ± 0.44                  |
| <b>OAD use at enrolment*, n (%)</b>                  |                                  |                              |
| Metformin monotherapy < 1500 mg/day                  | 34 (8.4)                         | 37 (9.1)                     |
| Metformin monotherapy ≥ 1500 mg/day                  | 231 (56.9)                       | 238 (58.3)                   |
| OAD and metformin < 1500 mg/day                      | 19 (4.7)                         | 28 (6.9)                     |
| OAD and metformin ≥ 1500 mg/day                      | 122 (30.0)                       | 104 (25.5)                   |
| No OAD                                               | 0                                | 1 (0.2)                      |
| <b>Metformin dose, median</b>                        |                                  |                              |
| At enrolment                                         | 1700                             | 1700                         |
| At randomization                                     | 2000                             | 2000                         |
| <b>Diabetes-related diseases, n (%)</b>              |                                  |                              |
| Neuropathy                                           | 23 (5.8)                         | 23 (5.7)                     |
| Retinopathy                                          | 22 (5.5)                         | 24 (6.0)                     |
| Nephropathy                                          | 15 (3.8)                         | 10 (2.5)                     |
| Microalbuminuria                                     | 42 (10.5)                        | 39 (9.7)                     |
| <b>Prior history of CVD†, n (%)</b>                  | 72 (18.0)                        | 78 (19.5)                    |
| <b>Hypertension, n (%)</b>                           | 282 (70.5)                       | 282 (70.3)                   |
| <b>Dyslipidemia, n (%)</b>                           | 245 (61.3)                       | 239 (59.6)                   |
| <b>Estimated GFR‡, n (%)</b>                         |                                  |                              |
| < 30 mL/min/1.73m <sup>2</sup>                       | 1 (0.3)                          | 1 (0.2)                      |

SUPPLEMENTARY DATA

|                                         |            |            |
|-----------------------------------------|------------|------------|
| ≥ 40 and < 60 mL/min/1.73m <sup>2</sup> | 18 (4.5)   | 23 (5.7)   |
| ≥ 60 and < 90 mL/min/1.73m <sup>2</sup> | 198 (49.5) | 181 (45.1) |
| ≥ 90 mL/min/1.73m <sup>2</sup>          | 183 (45.8) | 196 (48.9) |

BMI, Body Mass Index; CVD, cardiovascular disease; GFR, glomerular filtration rate; FPG, fasting plasma glucose; HbA1C, hemoglobin A1C; OAD, oral antidiabetic drug; type 2 diabetes, type 2 diabetes mellitus; SD, standard deviation. \*Patient numbers based on safety analysis set. †Does not include patients with a cardiovascular history of hypertension only. ‡Calculation of GFR based upon the Modification of Diet in Renal Disease formula; eGFR (mL/min/1.73m<sup>2</sup>) = 186 × (serum creatinine[mg/dL])<sup>-1.154</sup> × (Age)<sup>-0.203</sup> × (0.742 if female) × (1.21 if black).

**Supplementary Table 3. Proportion of patients reaching each dose level at the end of the titration period and down-titrated within the titration and double-blind treatment periods.**

|                                           | Number (percent) of patients         |                                  |
|-------------------------------------------|--------------------------------------|----------------------------------|
|                                           | Dapagliflozin + metformin<br>(n=406) | Glipizide + metformin<br>(n=408) |
| <b>Dose at end of titration period</b>    |                                      |                                  |
| DAPA 0 mg / GLIP 0 mg                     | 0                                    | 7 (1.7)                          |
| DAPA 2.5 mg / GLIP 5 mg (Level 1)         | 19 (4.7)                             | 54 (13.2)                        |
| DAPA 5 mg / GLIP 10 mg (Level 2)          | 34 (8.4)                             | 51 (12.5)                        |
| DAPA 10 mg / GLIP 20 mg (Level 3)         | 353 (86.9)                           | 296 (72.5)                       |
| Mean dose                                 | Dapagliflozin 9.2 mg                 | Glipizide 16.4 mg                |
| <b>Down-titration</b>                     |                                      |                                  |
| Within titration period                   | 9 (2.2)                              | 41 (10.0)                        |
| After titration period                    | 2 (0.5)                              | 21 (5.1)                         |
| Within and after the titration period     | 0                                    | 3 (0.7)                          |
| Neither within nor after titration period | 395 (97.3)                           | 343 (84.1)                       |

DAPA, dapagliflozin; GLIP, glipizide

SUPPLEMENTARY DATA

**Supplementary Table 4, Exploratory endpoints at week 52**

|                                                                                                                                          | <b>Dapagliflozin +<br/>metformin</b> | <b>Glipizide +<br/>metformin</b> |
|------------------------------------------------------------------------------------------------------------------------------------------|--------------------------------------|----------------------------------|
| <b>Absolute change in body weight (kg) in patients with baseline BMI <math>\geq 30</math> kg/m<sup>2</sup></b>                           |                                      |                                  |
| n                                                                                                                                        | 228                                  | 222                              |
| Baseline mean body weight                                                                                                                | 96.4                                 | 96.5                             |
| Adjusted mean change from baseline (95% CI)                                                                                              | -3.60 (-4.12, -3.09)                 | 1.55 (1.03, 2.07)                |
| Difference (95% CI) vs glipizide                                                                                                         | -5.15 (-5.8, -4.42)                  |                                  |
| <b>Absolute change in body weight (kg) in patients with baseline BMI <math>\geq 27</math> kg/m<sup>2</sup></b>                           |                                      |                                  |
| n                                                                                                                                        | 331                                  | 317                              |
| Baseline mean body weight                                                                                                                | 91.8                                 | 92.3                             |
| Adjusted mean change from baseline (95% CI)                                                                                              | -3.35 (-3.75, -2.95)                 | 1.41 (1.00, 1.81)                |
| Difference (95% CI) vs glipizide                                                                                                         | -4.76 (-5.3, -4.19)                  |                                  |
| <b>Change in waist circumference (cm)</b>                                                                                                |                                      |                                  |
| n                                                                                                                                        | 368                                  | 379                              |
| Baseline mean waist circumference                                                                                                        | 105.6                                | 104.8                            |
| Adjusted mean change from baseline (95% CI)                                                                                              | -2.33 (-2.85, -1.81)                 | 1.09 (0.58, 1.60)                |
| Difference (95% CI) vs glipizide                                                                                                         | -3.42 (-4.14, -2.69)                 |                                  |
| <b>Change in HbA1C (%) in patients with baseline HbA1C <math>\geq 7\%</math></b>                                                         |                                      |                                  |
| n                                                                                                                                        | 316                                  | 323                              |
| Baseline mean HbA1C                                                                                                                      | 7.96                                 | 8.01                             |
| Adjusted mean change from baseline (95% CI)                                                                                              | -0.65 (-0.74, -0.56)                 | -0.63 (-0.73, -0.54)             |
| Difference (95% CI) vs glipizide                                                                                                         | -0.02 (-0.15, 0.11)                  |                                  |
| <b>Proportion of patients (%) achieving HbA1C <math>&lt; 7\%</math> at week 52 in patients with baseline HbA1C <math>\geq 7\%</math></b> |                                      |                                  |
| Baseline mean HbA1C                                                                                                                      | 7.69                                 | 7.74                             |
| x/n                                                                                                                                      | 110/400                              | 128/401                          |
| Adjusted proportion (95% CI)                                                                                                             | 27.4% (23.0%, 31.8%)                 | 32.0% (27.4%, 36.6%)             |
| Difference (95% CI) vs glipizide                                                                                                         | -4.6% (-10.9%, 1.7%)                 |                                  |
| <b>Proportion of patients (%) with HbA1C <math>\leq 6.5\%</math> at week 52 (%)</b>                                                      |                                      |                                  |
| Baseline mean HbA1C                                                                                                                      | 7.69                                 | 7.74                             |
| x/n                                                                                                                                      | 67/400                               | 109/401                          |
| Adjusted proportion (95% CI)                                                                                                             | 16.5% (13.0%, 20.1%)                 | 27.5% (23.3%, 31.7%)             |
| Difference (95% CI) vs glipizide                                                                                                         | -11.0% (-16.6%, -5.3%)               |                                  |
| <b>Change in FPG (mmol/L)</b>                                                                                                            |                                      |                                  |
| n                                                                                                                                        | 399                                  | 394                              |
| Baseline mean FPG                                                                                                                        | 9.01                                 | 9.12                             |
| Adjusted mean change from baseline (95% CI)                                                                                              | -1.24 (-1.42, -1.07)                 | -1.04 (-1.22, -0.98)             |
| Difference (95% CI) vs glipizide                                                                                                         | -0.20 (-0.44, 0.05)                  |                                  |

n=the number of patients in the full analysis set with non-missing baseline and week 52 LOCF values. x=number of patients responding. BMI, body mass index; CI, confidence interval; FPG, fasting plasma glucose; HbA1C, hemoglobin A1C.

SUPPLEMENTARY DATA

**Supplementary Table 5. Selected laboratory values of interest and vital signs: change from baseline at week 52 using the safety analysis set.**

|                                                                       | Dapagliflozin + metformin |                        | Glipizide + metformin |                        |
|-----------------------------------------------------------------------|---------------------------|------------------------|-----------------------|------------------------|
|                                                                       | (n=406)                   |                        | (n=408)               |                        |
|                                                                       | Baseline mean             | Mean change at week 52 | Baseline mean         | Mean change at week 52 |
| Serum creatinine (µmol/L)                                             | 74.2 (23.8)               | -0.18 [1.11]           | 72.8 (17.5)           | 3.62 [0.63]            |
| Calculated creatinine renal clearance with current weight (mL/min)*   | 118.5 (38.5)              | -6.2 [0.9]             | 117.5 (39.6)          | -4.6 [0.9]             |
| Calculated creatinine renal clearance using baseline weight (mL/min)† | 118.7 (38.6)              | -0.1 [0.9]             | 117.8 (39.7)          | -5.5 [0.9]             |
| Estimated GFR (mL/min/1.73m <sup>2</sup> )‡                           | 89.6 (21.4)               | -0.5 [0.8]             | 90.5 (22.6)           | -5.4 [0.8]             |
| Cystatin-C (nmol/L)                                                   | 54.3 (12.2)               | 5.7 [0.5]              | 53.8 (12.3)           | 6.4 [0.4]              |
| Serum uric acid (µmol/L)                                              | 336.1 (86.7)              | -45.2 [3.4]            | 323.6 (82.3)          | 16.1 [3.4]             |
| Blood urea nitrogen (mmol/L)                                          | 5.5 (1.8)                 | 0.5 [0.08]             | 5.5 (1.7)             | 0.1 [0.07]             |
| Urine glucose (mmol/L)                                                | 9.3 (27.1)                | 141.2 [5.4]            | 8.4 (23.2)            | -4.1 [1.4]             |
| Urinary glucose:creatinine ratio (g/g)                                | 1.89 (5.97)               | 32.49 [1.25]           | 2.25 (12.92)          | -1.60 [0.87]           |
| Urine albumin:creatinine ratio (mg/g)                                 | 65.1 (215.6)              | -19.0 [6.6]            | 51.0 (340.4)          | -0.8 [7.1]             |
| Sodium (mmol/L)                                                       | 139.8 (2.9)               | 0.5 [0.17]             | 139.7 (3.0)           | 0.5 [0.16]             |
| Potassium (mmol/L)                                                    | 4.47 (0.44)               | -0.08 [0.02]           | 4.47 (0.43)           | 0.02 [0.03]            |
| Calcium (mmol/L)                                                      | 2.40 (0.11)               | -0.02 [0.01]           | 2.38 (0.13)           | -0.02 [0.01]           |
| Magnesium (mmol/L)                                                    | 1.68 (0.26)               | 0.08 [0.01]            | 1.68 (0.23)           | 0.00 [0.01]            |
| Inorganic phosphorus                                                  | 1.14 (0.16)               | 0.03 [0.01]            | 1.13 (0.17)           | 0.01 [0.01]            |
| Haematocrit (%)                                                       | 41.25 (3.61)              | 2.86 [0.14]            | 40.99 (3.38)          | 0.39 [0.13]            |
| Aspartate aminotransferase (U/L)                                      | 24.1 (11.1)               | -1.7 [0.5]             | 23.2 (10.5)           | 1.6 [0.5]              |
| Alanine aminotransferase (U/L)                                        | 29.7 (16.8)               | -5.0 [0.6]             | 29.3 (16.0)           | 0.8 [0.8]              |
| Alkaline phosphatase (U/L)                                            | 80.1 (26.1)               | -4.9 [0.7]             | 78.6 (23.2)           | -3.7 [0.7]             |
| Total bilirubin (µmol/L)                                              | 8.2 (4.1)                 | 0.0 [0.2]              | 7.9 (3.5)             | -0.3 [0.2]             |
| Parathyroid hormone (ng/L)                                            | 33.4 (17.1)               | 3.2 [0.73]             | 33.5 (16.9)           | 2.8 [0.79]             |
| 25-hydroxy vitamin D (nmol/L)                                         | 56.7 (22.1)               | -4.2 [0.9]             | 55.2 (20.3)           | -5.7 [0.8]             |
| Seated heart rate (bpm)                                               | 74.1 (10.9)               | -0.1 [0.5]             | 73.7 (10.3)           | 0.3 [0.5]              |
|                                                                       | Baseline                  | Week 52                | Baseline              | Week 52                |
|                                                                       | x/n (%)                   | x/n (%)                | x/n (%)               | x/n (%)                |
| Proportion with orthostatic hypotension                               | 15/294 (3.8%)             | 15/312 (4.8%)          | 20/391 (5.1%)         | 15/299 (5.0%)          |

Data are mean (standard deviation) or mean [standard error]; x=number of patients with orthostatic hypotension at baseline or week 52 defined as decrease from supine to standing of >20 mm Hg in systolic blood pressure or >10 mm Hg in diastolic blood pressure. n=number of patients with non-missing baseline or week 52 values in the safety analysis set.\*Calculated using the Cockcroft-Gault equation (14) with current values for body weight at each study visit; †Calculated *post hoc* using baseline body weight for all study visits. Cockcroft-Gault equation:  $eCC = ((140 - \text{Age}) \times \text{Weight in kg} \times (1.23 \text{ if male, } 1.04 \text{ if female})) / \text{serum creatinine in } \mu\text{mol per L}$ . ‡Calculation of glomerular filtration rate based upon the Modification of Diet in Renal Disease formula;  $eGFR (\text{mL}/\text{min}/1.73\text{m}^2) = 186 \times (\text{serum creatinine}[\text{mg}/\text{dL}])^{-1.154} \times (\text{Age})^{-0.203} \times (0.742 \text{ if female}) \times (1.21 \text{ if black})$ .

SUPPLEMENTARY DATA

**Supplementary Figure 1. Trial profile.** The term ‘incorrect enrollment’ was defined as patients not meeting inclusion criteria or meeting exclusion criteria. \*One patient took no placebo medication but was randomized. †down titration was permitted in the event of hypoglycemia. ‡Included in the listing of deaths because the patient died before the scheduled follow-up visit but was not included in the analysis of adverse events during the 52-week double-blind treatment period (Table 2) because the patient died >30 days after the last dose of double-blind study medication.

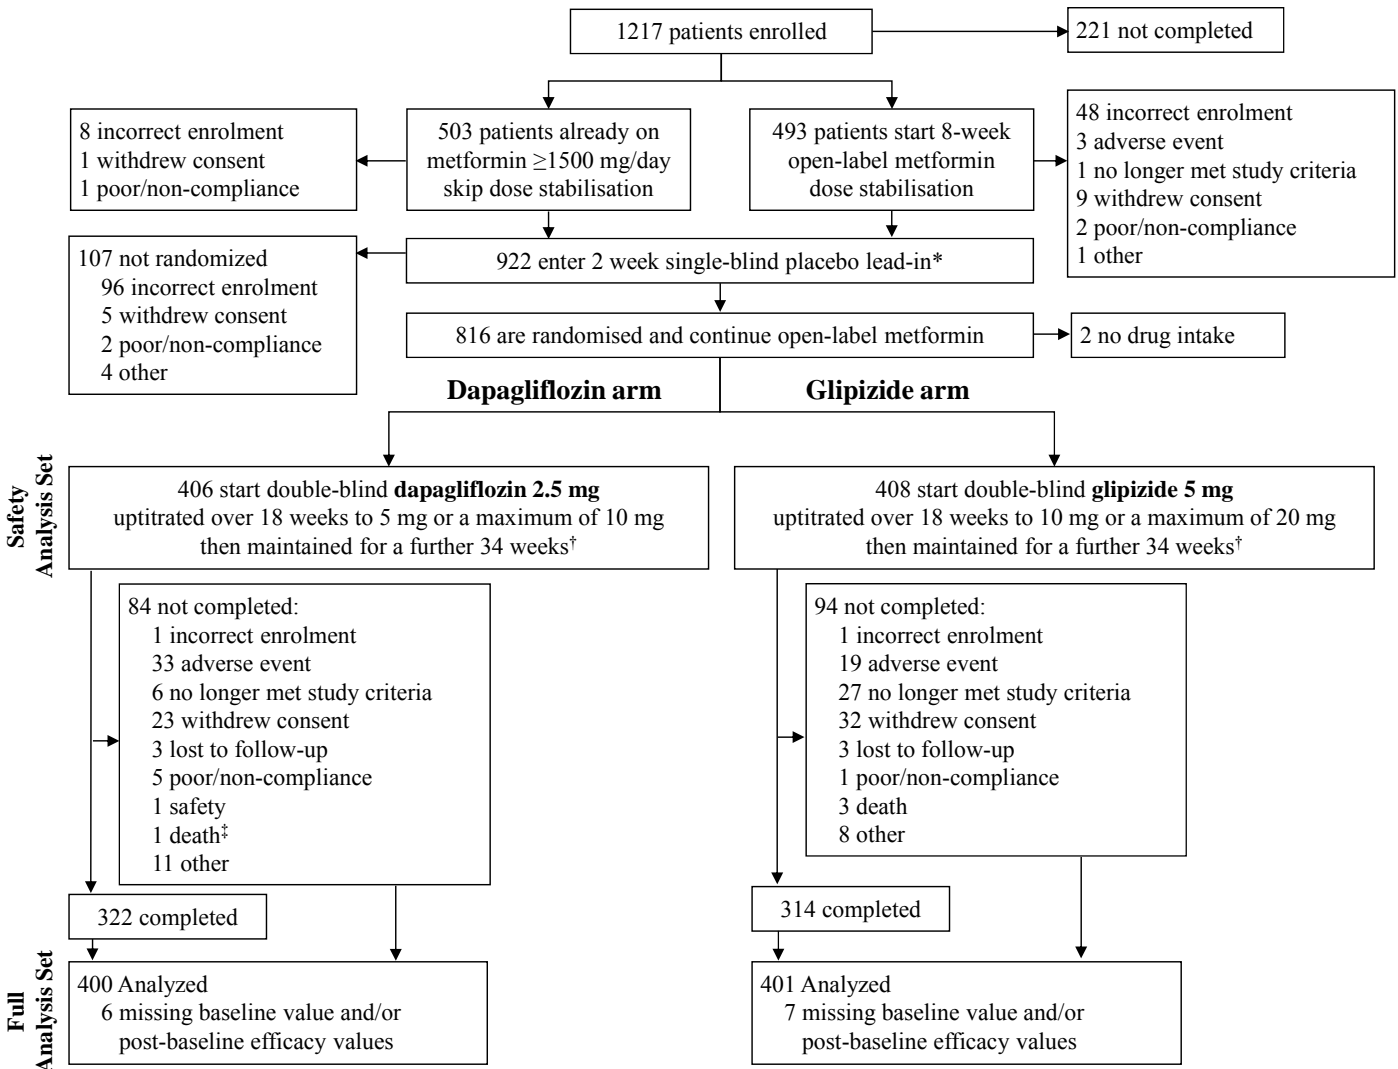

SUPPLEMENTARY DATA

**Supplementary Figure 2. Change in (A) blood pressure (BP, mmHg) and (B) cholesterol, triglycerides and free fatty acids (%) over the 52-week double-blind treatment period.** Data are adjusted mean change from baseline and 95% confidence intervals (CI) based upon ANCOVA with treatment group as effect and baseline value as covariate using the full analysis set and LOCF values. Lipid data are adjusted percent change from baseline based upon ANCOVA of log-transformed data with treatment group as effect and log (baseline value) as covariate using the full analysis set and LOCF values. \*Difference vs glipizide + metformin  $-5.0$  mmHg (95% CI of difference  $-6.7, -3.4$ ); † $-1.2$  mmHg (95% CI of difference  $-2.3, -0.2$ ); # $0.156$  mmol/L (95% CI of difference  $0.104, 0.210$ ). DBP, diastolic blood pressure; FFA, free fatty acids; HDL, high-density lipoprotein; LDL, low-density lipoprotein; SBP, systolic blood pressure, TC, total cholesterol, TG, triglycerides.

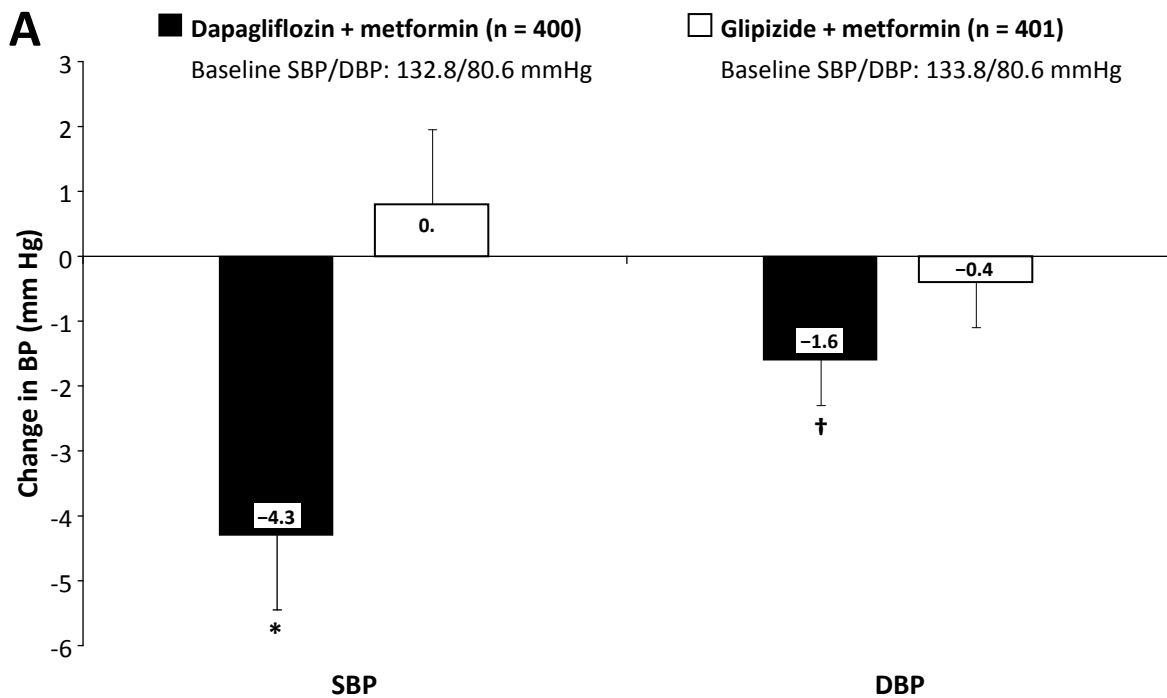



SUPPLEMENTARY DATA

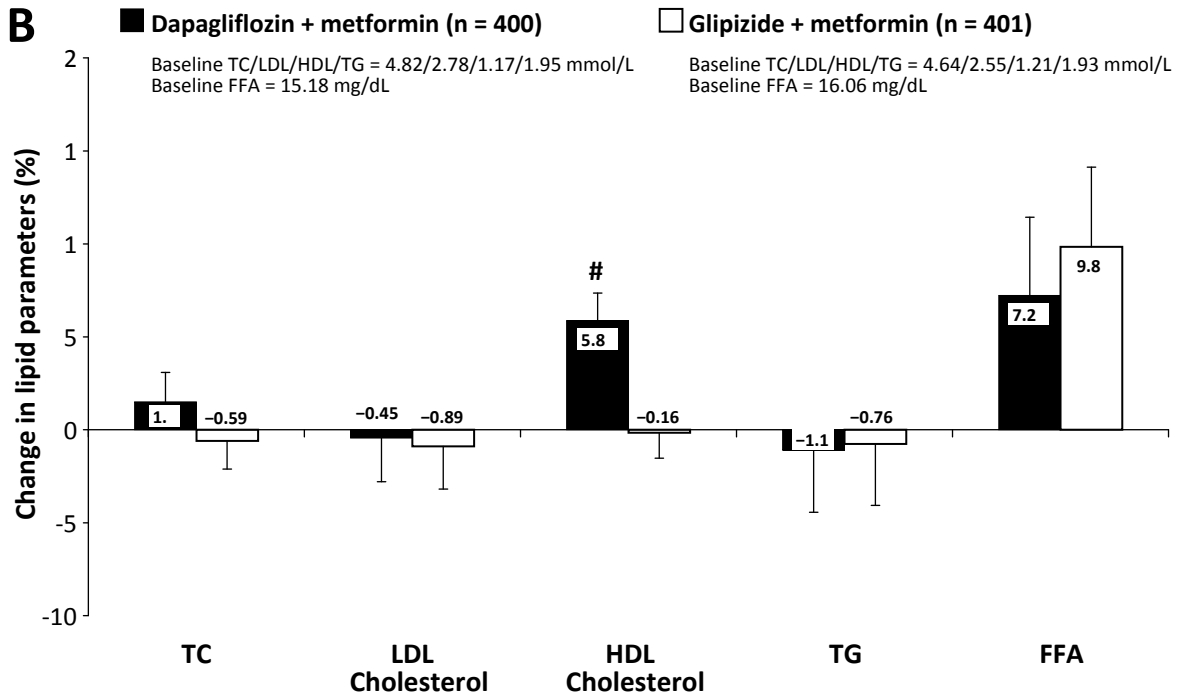

SUPPLEMENTARY DATA

**Supplementary Figure 3. Urinary glucose:creatinine ratio (g/g) during the 52-week double-blind treatment period.** Data are mean  $\pm$  standard deviation, obtained from morning spot urine checks in the fasting state and using the safety analysis set.

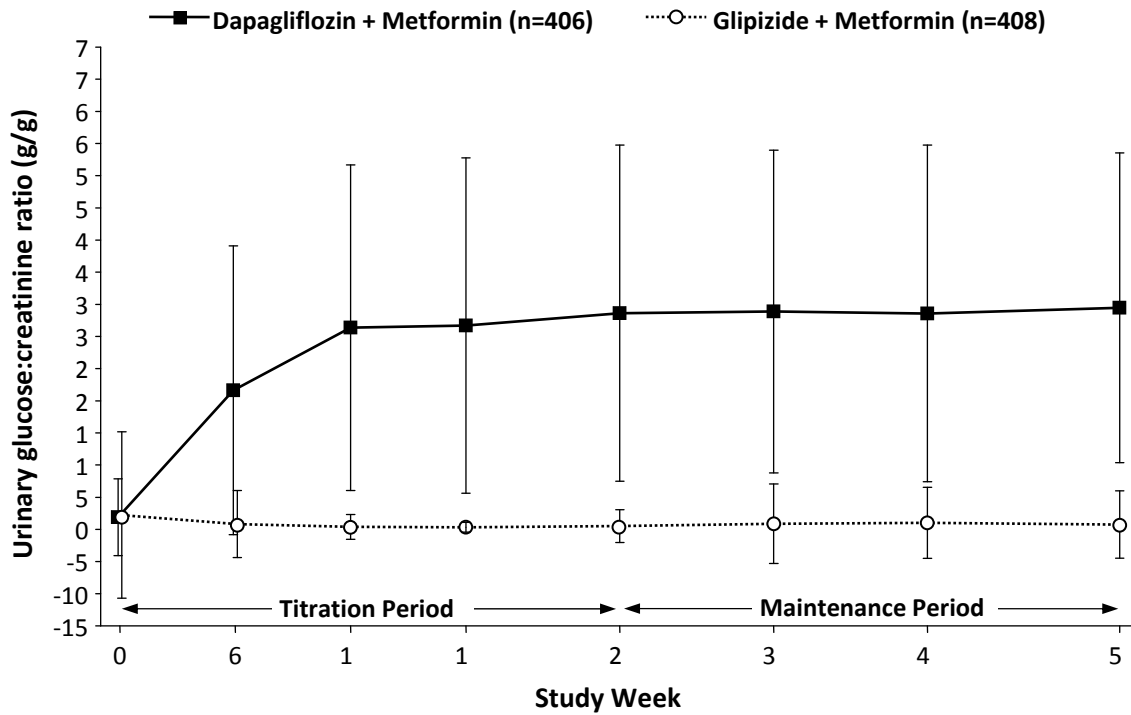

SUPPLEMENTARY DATA

CONSORT 2010 checklist of information to include when reporting a randomised trial\*

| Section/Topic                    | Item No | Checklist item                                                                                                                                                                              | Reported on page No (paragraph) |
|----------------------------------|---------|---------------------------------------------------------------------------------------------------------------------------------------------------------------------------------------------|---------------------------------|
| <b>Title and abstract</b>        |         |                                                                                                                                                                                             |                                 |
|                                  | 1a      | Identification as a randomised trial in the title                                                                                                                                           | 1                               |
|                                  | 1b      | Structured summary of trial design, methods, results, and conclusions (for specific guidance see CONSORT for abstracts)                                                                     | 2                               |
| <b>Introduction</b>              |         |                                                                                                                                                                                             |                                 |
| Background and objectives        | 2a      | Scientific background and explanation of rationale                                                                                                                                          | 3                               |
|                                  | 2b      | Specific objectives or hypotheses                                                                                                                                                           | 3(4)–4(1)                       |
| <b>Methods</b>                   |         |                                                                                                                                                                                             |                                 |
| Trial design                     | 3a      | Description of trial design (such as parallel, factorial) including allocation ratio                                                                                                        | 4(2), 6(2)                      |
|                                  | 3b      | Important changes to methods after trial commencement (such as eligibility criteria), with reasons                                                                                          | Not applicable                  |
| Participants                     | 4a      | Eligibility criteria for participants                                                                                                                                                       | 4(3) Online Appendix            |
|                                  | 4b      | Settings and locations where the data were collected                                                                                                                                        | 4(2)                            |
| Interventions                    | 5       | The interventions for each group with sufficient details to allow replication, including how and when they were actually administered                                                       | 5                               |
| Outcomes                         | 6a      | Completely defined pre-specified primary and secondary outcome measures, including how and when they were assessed                                                                          | 6(3)                            |
|                                  | 6b      | Any changes to trial outcomes after the trial commenced, with reasons                                                                                                                       | Not applicable                  |
| Sample size                      | 7a      | How sample size was determined                                                                                                                                                              | Online Appendix                 |
|                                  | 7b      | When applicable, explanation of any interim analyses and stopping guidelines                                                                                                                | Not applicable                  |
| Randomisation:                   |         |                                                                                                                                                                                             |                                 |
| Sequence generation              | 8a      | Method used to generate the random allocation sequence                                                                                                                                      | 6(2)                            |
|                                  | 8b      | Type of randomisation; details of any restriction (such as blocking and block size)                                                                                                         | 6(2)                            |
| Allocation concealment mechanism | 9       | Mechanism used to implement the random allocation sequence (such as sequentially numbered containers), describing any steps taken to conceal the sequence until interventions were assigned | 6(2)                            |
| Implementation                   | 10      | Who generated the random allocation sequence, who enrolled participants, and who assigned participants to interventions                                                                     | 6(2)                            |
| Blinding                         | 11a     | If done, who was blinded after assignment to interventions (for example, participants, care providers, those assessing outcomes) and how                                                    | 6(2)                            |

SUPPLEMENTARY DATA

|                                                      |     |                                                                                                                                                   |                                          |
|------------------------------------------------------|-----|---------------------------------------------------------------------------------------------------------------------------------------------------|------------------------------------------|
|                                                      | 11b | If relevant, description of the similarity of interventions                                                                                       | 6(2)                                     |
| Statistical methods                                  | 12a | Statistical methods used to compare groups for primary and secondary outcomes                                                                     | 7(3 onwards)                             |
|                                                      | 12b | Methods for additional analyses, such as subgroup analyses and adjusted analyses                                                                  | 8(3)                                     |
| <b>Results</b>                                       |     |                                                                                                                                                   |                                          |
| Participant flow (a diagram is strongly recommended) | 13a | For each group, the numbers of participants who were randomly assigned, received intended treatment, and were analysed for the primary outcome    | Figure A1                                |
|                                                      | 13b | For each group, losses and exclusions after randomisation, together with reasons                                                                  | Figure A1                                |
| Recruitment                                          | 14a | Dates defining the periods of recruitment and follow-up                                                                                           | 4(2)                                     |
|                                                      | 14b | Why the trial ended or was stopped                                                                                                                | Not applicable                           |
| Baseline data                                        | 15  | A table showing baseline demographic and clinical characteristics for each group                                                                  | Table A2                                 |
| Numbers analysed                                     | 16  | For each group, number of participants (denominator) included in each analysis and whether the analysis was by original assigned groups           | Figures 1 & 2                            |
| Outcomes and estimation                              | 17a | For each primary and secondary outcome, results for each group, and the estimated effect size and its precision (such as 95% confidence interval) | Figures 1 & 2                            |
|                                                      | 17b | For binary outcomes, presentation of both absolute and relative effect sizes is recommended                                                       | Not applicable                           |
| Ancillary analyses                                   | 18  | Results of any other analyses performed, including subgroup analyses and adjusted analyses, distinguishing pre-specified from exploratory         | Table 1, Tables A4 & A5, Figures A2 & A3 |
| Harms                                                | 19  | All important harms or unintended effects in each group (for specific guidance see CONSORT for harms)                                             | 10–12, Table 1                           |
| <b>Discussion</b>                                    |     |                                                                                                                                                   |                                          |
| Limitations                                          | 20  | Trial limitations, addressing sources of potential bias, imprecision, and, if relevant, multiplicity of analyses                                  | 13                                       |
| Generalisability                                     | 21  | Generalisability (external validity, applicability) of the trial findings                                                                         | 13                                       |
| Interpretation                                       | 22  | Interpretation consistent with results, balancing benefits and harms, and considering other relevant evidence                                     | 13                                       |
| <b>Other information</b>                             |     |                                                                                                                                                   |                                          |
| Registration                                         | 23  | Registration number and name of trial registry                                                                                                    | 2(2), 4(2)                               |
| Protocol                                             | 24  | Where the full trial protocol can be accessed, if available                                                                                       | Available on request                     |
| Funding                                              | 25  | Sources of funding and other support (such as supply of drugs), role of funders                                                                   | 16                                       |

\*We strongly recommend reading this statement in conjunction with the CONSORT 2010 Explanation and Elaboration for important clarifications on all the items. If relevant, we also recommend reading CONSORT extensions for cluster randomised trials, non-inferiority and equivalence trials, non-pharmacological treatments, herbal interventions, and pragmatic trials. Additional extensions are forthcoming: for those and for up to date references relevant to this checklist, see [www.consort-statement.org](http://www.consort-statement.org)
